# Supplementary material
Source: PubMed Central journal article supplement (PMC7925692)
Supplement: NIHMS1623575-supplement-1.pdf [file NIHMS1623575-supplement-1.pdf]

## SUPPLEMENTS

**Supplementary Table 1.** ICD-9 codes for alcohol and drug related diagnoses

| Condition                 | Subcategory                    | ICD-9 Codes        | Description of code         |                             |
|---------------------------|--------------------------------|--------------------|-----------------------------|-----------------------------|
| Alcohol related diagnoses |                                | 291                | Alcoholic psychosis         |                             |
|                           |                                | 291.0              | Alcohol withdrawal delirium |                             |
|                           |                                | 291.1              | Alcohol amnesic synd        |                             |
|                           |                                | 291.2x             | Alcoholic dementia Nec      |                             |
|                           |                                | 291.3              | Alcohol hallucinosis        |                             |
|                           |                                | 291.4              | Pathologic alcohol intox    |                             |
|                           |                                | 291.5              | Alcoholic jealousy          |                             |
|                           |                                | 291.8              | Alcoholic psychosis Nec     |                             |
|                           |                                | 291.81             | Alcohol withdrawal          |                             |
|                           |                                | 291.89             | Alcoholic psychosis Nec     |                             |
|                           |                                | 291.9              | Alcoholic psychosis nos     |                             |
|                           |                                | 305.0              | Alcohol abuse               |                             |
|                           |                                | 305.00             | Alcohol abuse-unspecified   |                             |
|                           |                                | 305.01             | Alcohol abuse-continuous    |                             |
|                           |                                | 305.02             | Alcohol abuse-episodic      |                             |
|                           |                                | 305.03             | Alcohol abuse-in remission  |                             |
|                           |                                | 790.3              | Excess blood-alcohol level  |                             |
|                           |                                | 980                | Toxic effect ethyl alcohol  |                             |
|                           |                                | 980.8              | Toxic effect alcohol Nec    |                             |
|                           |                                | 980.9              | Toxic effect alcohol Nos    |                             |
|                           |                                | E860.0             | Acc poison-alcohol beverage |                             |
|                           |                                | E860.1             | Acc poison-ethyl alcohol    |                             |
|                           |                                | E860.8             | Acc poison-alcohol Nec      |                             |
|                           |                                | E860.9             | Acc poison-alcohol nos      |                             |
|                           |                                | Alcohol Dependence | 303                         | Alcohol dependence syndrome |
|                           |                                |                    | 303.0                       | Ac alcohol intoxication     |
|                           |                                |                    | 303.00                      | Ac alcohol intox-unspec     |
|                           |                                | 303.01             | Ac alcohol intox-continuous |                             |
|                           |                                | 303.02             | Ac alcohol intox-episodic   |                             |
|                           |                                | 303.03             | In remission                |                             |
|                           |                                | 303.9              | Alcohol depend Nec/Nos      |                             |
|                           |                                | 303.90             | Unspecified                 |                             |
|                           |                                | 303.91             | Continuous                  |                             |
|                           |                                | 303.92             | Episodic                    |                             |
|                           |                                | 303.93             | In remission                |                             |
|                           | Complications from alcohol use | 357.5              | Alcoholic neuropathy        |                             |

|                               |        |                                      |
|-------------------------------|--------|--------------------------------------|
|                               | 425.5  | Alcoholic cardiomyopathy             |
|                               | 535.3  | Alcoholic gastritis                  |
|                               | 571.0  | Alcoholic fatty liver                |
|                               | 571.1  | Ac alcoholic hepatitis               |
|                               | 571.2  | Alcohol cirrhosis liver              |
|                               | 571.3  | Alcohol liver damage nos             |
| History of alcohol use        | V11.3  | Alcoholism                           |
| <b>Drug related diagnoses</b> | 292    | Drug psychosis                       |
|                               | 292.0  | Drug withdrawal syndrome             |
|                               | 292.1  | Paranoid and/or hallucinatory states |
|                               | 292.11 | Drug-induced organic delusion        |
|                               | 292.12 | Drug-induced hallucinosis            |
|                               | 292.2  | Pathologic drug intoxication         |
|                               | 304    | Drug dependence                      |
|                               | 304.00 | Opioid type dependence – unspecified |
|                               | 304.01 | Continuous                           |
|                               | 304.02 | Episodic                             |
|                               | 304.03 | In remission                         |
|                               | 304.09 | Other opioid type dependence         |
|                               | 304.10 | Barbiturate – unspecified            |
|                               | 304.11 | Continuous                           |
|                               | 304.12 | Episodic                             |
|                               | 304.13 | In remission                         |
|                               | 304.20 | Cocaine dependence – unspec          |
|                               | 304.21 | Continuous                           |
|                               | 304.22 | Episodic                             |
|                               | 304.23 | In remission                         |
|                               | 304.30 | Cannabis dependence – unspec         |
|                               | 304.31 | Continuous                           |
|                               | 304.32 | Episodic                             |
|                               | 304.33 | In remission                         |
|                               | 304.40 | Amphetamine – unspec                 |
|                               | 304.41 | Continuous                           |
|                               | 304.42 | Episodic                             |
|                               | 304.43 | In remission                         |
|                               | 304.50 | Hallucinogen dependence – unspec     |
|                               | 304.51 | Continuous                           |
|                               | 304.52 | Episodic                             |
|                               | 304.53 | In remission                         |
|                               | 304.6  | Other specified drug dependence      |
|                               | 304.60 | Unspecified                          |

|        |                                               |
|--------|-----------------------------------------------|
| 304.61 | Continuous                                    |
| 304.62 | Episodic                                      |
| 304.63 | In remission                                  |
| 304.7  | Combination of opiod type drug with any other |
| 304.70 | Unspec                                        |
| 304.71 | Continuous                                    |
| 304.72 | Episodic                                      |
| 304.73 | In remission                                  |
| 304.8  | Combinations of drug dependence exc opiod     |
| 304.80 | Unspec                                        |
| 304.81 | Continuous                                    |
| 304.82 | Episodic                                      |
| 304.83 | In remission                                  |
| 304.9  | Unspec drug dependence                        |
| 304.90 | Unspec                                        |
| 304.91 | Continuous                                    |
| 304.92 | Episodic                                      |
| 304.93 | In remission                                  |
| 305.20 | Cannabis abuse – unspec                       |
| 305.21 | Continuous                                    |
| 305.22 | Cannabis abuse – episodic                     |
| 305.23 | In remission                                  |
| 305.29 | Other cannabis use - Nec                      |
| 305.30 | Hallucinogen abuse – unspec                   |
| 305.31 | Continuous                                    |
| 305.32 | Episodic                                      |
| 305.33 | In remission                                  |
| 305.40 | Barbiturate abuse – unspec                    |
| 305.41 | Continuous                                    |
| 305.42 | Episodic                                      |
| 305.43 | In remission                                  |
| 305.50 | Opiod abuse – unspec                          |
| 305.51 | Continuous                                    |
| 305.52 | Episodic                                      |
| 305.53 | In remission                                  |
| 305.60 | Cocaine abuse – unspec                        |
| 305.61 | Continuous                                    |
| 305.62 | Episodic                                      |
| 305.63 | In remission                                  |
| 305.70 | Amphetamine abuse – unspec                    |
| 305.71 | Continuous                                    |
| 305.72 | Episodic                                      |
| 305.73 | In remission                                  |

|        |                                        |
|--------|----------------------------------------|
| 305.80 | Antidepressant type abuse – unspec     |
| 305.81 | Continuous                             |
| 305.82 | Episodic                               |
| 305.83 | In remission                           |
| 305.9  | Other, mixed or unspecified drug abuse |
| 305.90 | Unspec                                 |
| 305.91 | Continuous                             |
| 305.92 | Episodic                               |
| 305.93 | In remission                           |
